# Supplementary material for: Environmental impacts on soil and groundwater at airports: origin, contaminants of concern and environmental risks
Source: Royal Society of Chemistry journal article supplement (doi:10.1039/c1em10458f), 2011-01-01
Supplement: c1em10458f.pdf [file c1em10458f.pdf]

1  
2  
3  
4  
5  
6  
7  
8  
9  
10  
11

# Environmental impacts to soil and groundwater at airports: origin, contaminants of concern and environmental risks

L. M. Nunes, Y-G. Zhu, T. Y. Stigter, J. P. Monteiro, M. R. Teixeira

## SUPPLEMENTARY MATERIAL

**Table I.** Origins of the contaminants of concern at airports

| Airport identification             | Matrix | Origin            |      |              |            |                     |             |                |                     | In use | Reference   |           |
|------------------------------------|--------|-------------------|------|--------------|------------|---------------------|-------------|----------------|---------------------|--------|-------------|-----------|
|                                    |        | Surface runoff    |      |              | Fuel leaks |                     |             | Dir. Dep. ARFF | Accidental releases |        |             | Atm. dep. |
|                                    |        | Runoff and piping | ADAF | Repair shops | Fuel farm  | Fuel hydrant system | Fuel distr. |                |                     |        |             |           |
| Castle AFB, USA                    | S, Gw  | X                 |      | X            |            |                     |             | X              |                     |        | 1941–1995   | 1         |
| Crystal City Airport, USA          | S      | X                 |      |              |            |                     |             |                |                     |        | 1945-1987   | 2         |
| Middletown, USA                    | S, Gw  |                   |      | X            |            |                     |             |                |                     |        | 1942-       | 3         |
| Unspecified airport                | S, Gw  |                   |      |              |            |                     |             | X              |                     |        | -           | 4         |
| Tyndall Air Force Base, USA        | Gw     |                   |      |              |            |                     |             | X              |                     |        | 1941-       | 5         |
| Wurtsmith Air Force Base, USA      | Gw     |                   |      |              |            |                     |             | X              |                     |        | 1923-1993   | 6         |
| Tri-County P. Airport, USA         | Gw     |                   |      | X            |            |                     |             |                |                     |        | 1942-1948   | 7         |
| Seattle-Tacoma I.A., USA           | S, Gw  |                   |      |              | X          | X                   | X           |                |                     |        | 1944-       | 8         |
| Yakima Airport, USA                | S, Gw  |                   |      |              | X          |                     |             |                |                     |        | 1928-       | 9         |
| New Hanover CNTY Airport, USA      | S, Gw  |                   |      |              |            |                     |             | X              |                     |        | 1968-1979** | 10        |
| Twin Cities Res. AFB, USA          | S, Gw  |                   |      | X            | X          | X                   | X           |                |                     |        | 1940-       | 11        |
| George AFB, USA                    | S, Gw  |                   |      | X            | X          | X                   |             |                |                     |        | 1941–1992   | 12        |
| Marine Corps AS Yuma, USA          | S, Gw  |                   |      | X            | X          |                     |             | X              |                     |        | 1959-       | 13        |
| El Toro Marine C. Air Station, USA | Gw     |                   |      | X            |            |                     |             |                |                     |        | 1943 - 1999 | 14        |
| Hanscom AFB, USA                   | Gw     |                   |      |              |            |                     |             |                |                     |        | 1942-       | 15        |
| Travis AFB, USA                    | Gw     |                   |      |              | X          |                     |             | X              |                     |        | 1942-       | 16        |
| Vandenberg AFB, USA                | Gw     |                   |      |              | X          |                     |             | X              |                     |        | 1957-       | 16        |
| Minneapolis I.A., USA              | S      |                   |      |              |            | X                   |             |                |                     |        | 1921-       | 17        |
| Toronto I.A. Canada                | S      |                   |      |              |            | X                   |             |                |                     |        | 1939-       | 18        |
| Kai Tak Airport, Hong Kong         | S      | X                 |      |              | X          |                     | X           |                |                     |        | 1925-1998   | 19        |

| Airport identification             | Matrix | Origin            |      |              |            |                     |             |           | Accidental releases | Atm. dep.  | In use     | Reference |
|------------------------------------|--------|-------------------|------|--------------|------------|---------------------|-------------|-----------|---------------------|------------|------------|-----------|
|                                    |        | Surface runoff    |      |              | Fuel leaks |                     |             | Dir. Dep. |                     |            |            |           |
|                                    |        | Runoff and piping | ADAF | Repair shops | Fuel farm  | Fuel hydrant system | Fuel distr. | ARFF      |                     |            |            |           |
| Hradcany army AB, Czech Rep.       | S      |                   |      |              |            |                     |             |           |                     | 1945-      | 20         |           |
| Portland-Troutdale Airport, USA    | S      |                   |      | X            |            |                     |             |           |                     | 1942-      | 21         |           |
| Sangster I.A., Jamaica             | S, Gw  |                   |      |              |            | X                   |             |           |                     | 1947-      | 22         |           |
| Deblin, military airfield, Poland  | S      |                   |      |              |            |                     |             |           | X                   | -          | 23         |           |
| Delhi I.A., India                  | S      |                   |      |              |            |                     |             |           | X                   | 1940s-     | 24         |           |
| Monchegorsk air base, Russia       | S      |                   |      |              |            |                     |             |           | X                   | -          | 25         |           |
| French airport                     | S      |                   |      |              |            |                     |             |           | X                   | -          | 26         |           |
| Santa Monica Airport, USA          | S      |                   |      |              |            |                     |             |           | X                   | 1920s-     | 27         |           |
| Oslo Gardermoen I.A., Norway       | S, Gw  |                   |      |              |            |                     |             | X         |                     | 1998-      | 28         |           |
| Gaiziunai M.A., Lithuania          | Gw     | X                 |      |              |            |                     |             |           |                     | 1939-      | 29         |           |
| Fornebu Airport, Norway            | S      |                   |      |              |            |                     |             |           |                     | 1940s-1998 | 30         |           |
| 4 airports in Croatia              | S      | X(4)              |      |              |            |                     |             |           | X(4)                | X(4)       | -          | 31        |
| Airport near Berlin, Germany       | S      | X                 |      |              |            |                     |             |           |                     |            | -          | 32        |
| Fairchild AFB, USA                 | Gw     |                   | X    |              |            |                     |             |           |                     |            | 1942-      | 33        |
| North American I.A., USA           | Gw     | X                 | X    |              |            |                     |             |           |                     |            | -          | 34        |
| Bellingham I.A., USA               | S      |                   | X    |              |            |                     |             |           |                     | X          | 1940-      | 35        |
| Fairchild AFB, USA                 | S, Gw  |                   | X    |              |            |                     |             |           |                     | X          | 1942-      | 35        |
| General Mitchell I.A., USA         | S      |                   | X    |              |            |                     |             |           |                     | X          | 1920-      | 35        |
| Fornebu Airport, Norway            | S, Gw  |                   | X    |              |            |                     |             |           |                     |            | 1940s-1998 | 36        |
| Perth Airport, Australia           | S, Gw  | X                 |      |              | X          | X                   | X           | X         |                     |            | 1943-      | 37        |
| 5 Air Force Bases, USA             | Gw     |                   |      |              | X(5)       |                     |             |           |                     |            | -          | 38        |
| Kluczewo military airport, Poland. | S, Gw  |                   |      |              | X          |                     |             |           |                     |            | 1935-      | 39        |
| Genève I.A., Switzerland           | S      | X                 |      |              |            |                     |             |           |                     | X          | 1920-      | 40        |
| Berlin, military airfield, Germany | Gw     |                   |      |              | X          |                     |             |           |                     |            | -          | 41        |
| Hradcany AFB, Czech Republic       | S      |                   |      |              | X          |                     |             |           |                     |            | 1945-      | 42        |
| <b>Sum of subtype origin</b>       |        | 12                | 6    | 8            | 17         | 7                   | 7           |           |                     |            |            |           |
| %                                  |        | 23.0              | 11.5 | 15.5         | 32.7       | 13.5                | 13.5        |           |                     |            |            |           |
| <b>Sum of origin*</b>              |        |                   | 24   |              |            | 20                  |             | 7         | 4                   | 13         |            |           |
| %                                  |        |                   | 46.2 |              |            | 38.5                |             | 13.5      | 7.7                 | 25.0       |            |           |

Gw: groundwater; S: soil. \*: when any of the origin subtypes occur; \*\*: refers to the facility, not the airport

14  
 15  
 16

**Table II.** Contaminants found in soil and groundwater at airports

| Airport identification             | Contaminants           |            |     |          |     |             |     |                  |     |            |      |      |    |              |    |    |    |    |    |  |
|------------------------------------|------------------------|------------|-----|----------|-----|-------------|-----|------------------|-----|------------|------|------|----|--------------|----|----|----|----|----|--|
|                                    | Petroleum hydrocarbons |            |     | Solvents |     |             |     |                  |     | Pesticides | ADAF | ARFF |    | Heavy Metals |    |    |    |    |    |  |
|                                    | BTEX                   | Fuel & Oil | PAH | TCE      | PCE | cis-1,2-DCE | PCB | CCl <sub>4</sub> | PFC |            |      | Cd   | Cr | Cu           | Ni | Hg | As | Pb | Zn |  |
| Castle AFB, USA                    | X                      | X          |     | X        | X   | X           |     |                  |     |            |      | X    | X  | X            | X  |    | X  | X  | X  |  |
| Crystal City Airport, USA          |                        | X          |     |          |     |             |     |                  |     | X          |      |      |    |              |    |    |    |    |    |  |
| Middletown, USA                    |                        |            |     | X        |     |             |     |                  |     | X          |      |      |    |              |    |    |    |    |    |  |
| Unspecified airport                |                        |            |     |          |     |             |     |                  |     |            |      | X    |    |              |    |    |    |    |    |  |
| Tyndall Air Force Base, USA        |                        |            |     |          |     |             |     |                  |     |            |      | X    |    |              |    |    |    |    |    |  |
| Wurtsmith Air Force Base, USA      |                        |            |     |          |     |             |     |                  |     |            |      | X    |    |              |    |    |    |    |    |  |
| Tri-County P. Airport, USA         |                        |            |     | X        |     |             |     |                  |     |            |      |      |    |              |    |    |    |    |    |  |
| Seattle-Tacoma I.A., USA           | X                      | X          |     |          |     |             |     |                  |     |            |      |      |    |              |    |    |    |    |    |  |
| Yakima Airport, USA                | X                      | X          |     |          |     |             |     |                  |     |            |      |      |    |              |    |    |    |    |    |  |
| New Hanover CNTY Airport, USA      | X                      | X          | X   |          |     | X           |     |                  |     |            |      |      | X  |              |    |    |    |    |    |  |
| Twin Cities Res. AFB, USA          | X                      |            |     | X        |     |             |     |                  |     |            |      |      |    |              |    |    |    |    |    |  |
| George AFB, USA                    | X                      | X          |     | X        |     |             |     |                  |     |            |      |      |    |              |    |    |    |    |    |  |
| Marine Corps AS Yuma, USA          | X                      | X          |     | X        | X   | X           |     |                  |     | X          |      |      |    |              |    |    |    |    | X  |  |
| El Toro Marine C. Air Station, USA |                        |            |     | X        | X   |             |     | X                |     |            |      |      |    |              |    |    |    |    |    |  |
| Hanscom AFB, USA                   | X                      | X          | X   | X        | X   | X           |     |                  |     |            |      |      |    |              |    |    |    |    |    |  |
| Travis AFB, USA                    | X                      | X          |     |          |     |             |     |                  |     |            |      |      |    |              |    |    |    |    |    |  |
| Vandenberg AFB, USA                | X                      | X          |     |          |     |             |     |                  |     |            |      |      |    |              |    |    |    |    |    |  |
| Minneapolis I.A., USA              |                        | X          |     |          |     |             |     |                  |     |            |      |      |    |              |    |    |    |    |    |  |
| Toronto I.A. Canada                |                        | X          |     |          |     |             |     |                  |     |            |      |      |    |              |    |    |    |    |    |  |
| Kai Tak Airport, Hong Kong         | X                      | X          |     |          |     |             |     |                  |     |            |      |      |    |              |    |    |    |    |    |  |
| Hradcany army AB, Czech Rep.       |                        | X          |     |          |     |             |     |                  |     |            |      |      |    |              |    |    |    |    |    |  |
| Portland-Troutdale Airport, USA    |                        |            |     | X        |     |             |     |                  |     |            |      |      | X  |              |    |    |    |    | X  |  |
| Sangster I.A., Jamaica             |                        | X          |     |          |     |             |     |                  |     |            |      |      |    |              |    |    |    |    |    |  |
| Deblin, military airfield, Poland  |                        |            | X   |          |     |             |     |                  |     |            |      |      |    |              |    |    |    |    |    |  |
| Delhi I.A., India                  |                        |            | X   |          |     |             |     |                  |     |            |      |      |    |              |    |    |    |    |    |  |
| Monchegorsk air base, Russia       |                        |            | X   |          |     |             |     |                  |     |            |      |      |    |              |    |    |    |    |    |  |
| French airport                     |                        |            | X   |          |     |             |     |                  |     |            |      |      |    |              |    |    |    |    |    |  |
| Santa Monica Airport               |                        |            | X   |          |     |             |     |                  |     |            |      |      |    |              |    |    |    |    |    |  |
| Olso Gardermoen I.A., Norway       | X                      | X          | X   |          |     |             |     |                  |     |            |      |      |    |              |    |    |    |    |    |  |
| Gaiziunai M.A., Lithuania          |                        | X          |     |          |     |             |     |                  |     |            |      |      |    |              |    |    |    |    |    |  |
| Fornebu Airport, Norway            |                        |            | X   |          |     |             |     |                  |     |            |      |      |    |              |    |    |    |    |    |  |
| 4 airports in Croatia              |                        |            |     |          |     |             |     | X(4)             |     |            |      |      |    |              |    |    |    |    |    |  |
| Berlin Airport, Germany            |                        |            |     |          |     |             |     | X                |     |            |      |      |    |              |    |    |    |    |    |  |
| Fairchild AFB, USA                 |                        |            |     |          |     |             |     |                  |     |            | X    |      |    |              |    |    |    |    |    |  |
| North American I.A.                |                        |            |     |          |     |             |     |                  |     |            |      | X    |    |              |    |    |    |    |    |  |
| Bellingham I.A., USA               |                        |            |     |          |     |             |     |                  |     |            |      | X    |    |              |    |    |    |    |    |  |
| Fairchild AFB, USA                 |                        |            |     |          |     |             |     |                  |     |            |      | X    |    |              |    |    |    |    |    |  |

| Airport identification             | Contaminants           |            |      |          |     |                     |     |                  |     |            |      |      |     |              |      |     |     |     |     |  |
|------------------------------------|------------------------|------------|------|----------|-----|---------------------|-----|------------------|-----|------------|------|------|-----|--------------|------|-----|-----|-----|-----|--|
|                                    | Petroleum hydrocarbons |            |      | Solvents |     |                     |     |                  |     | Pesticides | ADAF | ARFF |     | Heavy Metals |      |     |     |     |     |  |
|                                    | BTEX                   | Fuel & Oil | PAH  | TCE      | PCE | <i>cis</i> -1,2-DCE | PCB | CCl <sub>4</sub> | PFC |            |      | Cd   | Cr  | Cu           | Ni   | Hg  | As  | Pb  | Zn  |  |
| General Mitchell I.A., USA         |                        |            |      |          |     |                     |     |                  |     |            | X    |      |     |              |      |     |     |     |     |  |
| Fornebu Airport, Norway            |                        |            |      |          |     |                     |     |                  |     |            | X    |      |     |              |      |     |     |     |     |  |
| Perth Airport, Australia           |                        |            |      |          |     |                     |     |                  |     |            |      |      | X   | X            | X    | X   | X   | X   | X   |  |
| 5 Air Force Bases, USA             | X(5)                   | X(5)       |      |          |     |                     |     |                  |     |            |      |      |     |              |      |     |     |     |     |  |
| Kluczewo military airport, Poland. | X                      | X          |      |          |     |                     |     |                  |     |            |      |      |     |              |      |     |     |     |     |  |
| Genève I.A., Switzerland           |                        |            |      |          |     |                     |     |                  |     |            |      |      | X   |              | X    |     |     |     | X   |  |
| Berlin, former military airfield   | X                      | X          | X    |          |     |                     |     |                  |     |            |      |      |     |              |      |     |     |     | X   |  |
| Hradcany AFB, Czech Republic       |                        | X          |      |          |     |                     |     |                  |     |            |      |      |     |              |      |     |     |     |     |  |
| <b>Total</b>                       | 19                     | 25         | 10   | 9        | 4   | 4                   | 5   | 1                |     |            |      |      | 2   | 4            | 3    | 2   | 1   | 2   | 5   |  |
| <b>%</b>                           | 36.5                   | 48.1       | 19.2 | 17.6     | 7.8 | 7.8                 | 9.8 | 2.0              |     |            |      |      | 3.9 | 7.8          | 3.9  | 3.9 | 2.0 | 3.9 | 7.8 |  |
| <b>Total</b>                       |                        | 33         |      |          |     | 15                  |     |                  | 3   | 6          | 3    |      |     |              | 6    |     |     |     |     |  |
| <b>%</b>                           |                        | 63.5       |      |          |     | 29.4                |     |                  | 5.9 | 11.8       | 5.9  |      |     |              | 11.8 |     |     |     |     |  |

17  
 18  
 19

20  
 21  
 22

**Table III.** Health and ecological hazards for contaminants found at airports

| Chemical                            | Ecological hazard                                                                                                                                                         | Health hazard                                                                                                                                                                                                  |                                              |
|-------------------------------------|---------------------------------------------------------------------------------------------------------------------------------------------------------------------------|----------------------------------------------------------------------------------------------------------------------------------------------------------------------------------------------------------------|----------------------------------------------|
| TCE                                 | $PNEC_{\text{water}}=115 \mu\text{g/l}$ , $PNEC_{\text{sediment}}=316 \mu\text{g/g}$ , $PNEC_{\text{soil}}=202 \mu\text{g/kg}$ <sup>43</sup> .                            | Probably carcinogenic <sup>43-45</sup> .                                                                                                                                                                       |                                              |
| PCE                                 | $PNEC_{\text{water}}= 51 \mu\text{g/l}$ , $PNEC_{\text{sediment}}=318 \mu\text{g/kg}$ and $PNEC_{\text{soil}}=10 \mu\text{g/kg}$ , <sup>43</sup> .                        | Toxic at high concentrations <sup>43-45</sup> , carcinogenicity not yet determined.                                                                                                                            |                                              |
| <i>cis</i> -1,2-DCE                 | $PNEC_{\text{water}}=45 \mu\text{g/l}$ , $PNEC_{\text{sediment}}=318 \mu\text{g/kg}$ and $PNEC_{\text{soil}}=10 \mu\text{g/kg}$ <sup>46</sup> .                           | Mild toxicity <sup>43,44</sup> . 1,1-DCE: subchronic NOAEL of 0.09 mg/kg bw/d <sup>47</sup> ; <i>cis</i> -1,2-DCE: subchronic NOAEL of 3.2 mg/kg bw/d (trans-1,2-DCE: NOAEL of 1.7 mg/kg bw/d) <sup>48</sup> . |                                              |
| 1,1,-DCE                            |                                                                                                                                                                           |                                                                                                                                                                                                                |                                              |
| PCB                                 | PNEC for compartments not available.                                                                                                                                      | Probable human carcinogen <sup>43,44</sup> .                                                                                                                                                                   |                                              |
| MtBE                                | $PNEC_{\text{water}}=2.6 \text{ mg/l}$ , $PNEC_{\text{sediment}}=2.05 \text{ mg /kg}$ <sup>49</sup>                                                                       | Mild toxicity <sup>50</sup> . Oral NOAEL of 300 mg /kg and respiratory NOAEL of 800 ppm. Human cancer risk is presumed to be low <sup>49</sup> .                                                               |                                              |
| Benzene                             | $PNEC_{\text{water}}=80 \mu\text{g/l}$ and $PNEC_{\text{soil}}=200 \mu\text{g/kg}$ <sup>43</sup> .                                                                        | Human carcinogen <sup>43-45</sup> .                                                                                                                                                                            |                                              |
| Toluene                             | $PNEC_{\text{water}}=74 \mu\text{g/l}$ and $PNEC_{\text{soil}}=0.3 \text{ mg/kg}$ <sup>43</sup> , $PNEC_{\text{sediment}}= 343 \mu\text{g/kg}$ <sup>51</sup> .            | Mild toxicity: subchronic NOAEL of 625 mg/kg bw/d <sup>43-45</sup> .                                                                                                                                           |                                              |
| Ethylbenzene                        | $PNEC_{\text{water}}=100 \mu\text{g/l}$ , $PNEC_{\text{sediment}}=1017 \mu\text{g/kg}$ and $PNEC_{\text{soil}}=776 \mu\text{g/kg}$ <sup>43</sup> .                        | Mild toxicity <sup>43-45</sup> . Limited data on humans.                                                                                                                                                       |                                              |
| Xilenes                             | PNEC for compartments not available.                                                                                                                                      | Mild toxicity, data are still inadequate for an assessment of the carcinogenic potential of xylenes <sup>43,44</sup> . Subchronic NOAEL of 17.9 mg/kg bw/d <sup>44</sup> .                                     |                                              |
| Acenaphthylene                      | $PNEC_{\text{soil}}= 2.3 \text{ mg/kg}$ *.                                                                                                                                | Insufficient data <sup>44</sup> .                                                                                                                                                                              |                                              |
| 2-Methylnaphthalene                 | -                                                                                                                                                                         |                                                                                                                                                                                                                |                                              |
| Acenaphthene                        | $PNEC_{\text{water}}= 3.7 \mu\text{g/l}$ <sup>52</sup> ; $PNEC_{\text{soil}}=1300 \mu\text{g/kg}$ <sup>53</sup> .                                                         |                                                                                                                                                                                                                |                                              |
| Fluorene                            | $PNEC_{\text{water}}= 0.25 \mu\text{g/l}$ <sup>52</sup> ; $PNEC_{\text{soil}}= 77.0 \mu\text{g/kg}$ <sup>53</sup> .                                                       |                                                                                                                                                                                                                |                                              |
| Anthracene                          | $PNEC_{\text{water}}= 0.12 \mu\text{g/l}$ , $PNEC_{\text{sediment}}= 11.9 \mu\text{g/kg}$ , and $PNEC_{\text{soil}}= 130 \mu\text{g/kg}$ <sup>43</sup> .                  |                                                                                                                                                                                                                |                                              |
| Benzo[g,h,i]perylene                | PNEC for compartments not available                                                                                                                                       |                                                                                                                                                                                                                |                                              |
| Fluoranthene                        | $PNEC_{\text{sediment}}= 129 \mu\text{g/kg}$ <sup>51</sup> , $PNEC_{\text{soil}}= 1.3 \text{ mg/kg}$ <sup>54</sup> .                                                      |                                                                                                                                                                                                                |                                              |
| Pyrene                              | $PNEC_{\text{water}}= 0.024 \mu\text{g/l}$ <sup>52</sup> , $PNEC_{\text{soil}}=1.0 \text{ mg/kg}$ <sup>54</sup> .                                                         |                                                                                                                                                                                                                |                                              |
| Perylene                            | $PNEC_{\text{soil}}= 56.0 \text{ mg/kg}$ *.                                                                                                                               |                                                                                                                                                                                                                |                                              |
| Phenanthrene                        | $PNEC_{\text{water}}= 1.34 \mu\text{g/l}$ <sup>52</sup> , $PNEC_{\text{soil}}= 2.3 \text{ mg/kg}$ <sup>54</sup> .                                                         |                                                                                                                                                                                                                |                                              |
| Benzo[a]anthracene (B[a]a)          | $PNEC_{\text{soil}}= 97.5 \text{ mg/kg}$ *.                                                                                                                               |                                                                                                                                                                                                                | Probable human carcinogen <sup>44,55</sup> . |
| Benzo[a]pyrene (B[a]p)              | $PNEC_{\text{water}}= 0.005 \mu\text{g/l}$ <sup>56</sup> and $PNEC_{\text{soil}}= 84.4 \text{ mg/kg}$ *, and $PNEC_{\text{sediment}}= 543 \mu\text{g/kg}$ <sup>51</sup> . |                                                                                                                                                                                                                |                                              |
| Benzo[b]fluoranthene (B[b]f)        | $PNEC_{\text{soil}}= 36.0 \text{ mg/kg}$ *.                                                                                                                               |                                                                                                                                                                                                                |                                              |
| <b>Benzo[k]fluoranthene (B[k]f)</b> | $PNEC_{\text{soil}}= 56.0 \text{ mg/kg}$ *, and $PNEC_{\text{sediment}}= 0.0 \mu\text{g/kg}$ <sup>51</sup> .                                                              |                                                                                                                                                                                                                |                                              |
| Chrysene                            | $PNEC_{\text{soil}}= 102.5 \text{ mg/kg}$ *                                                                                                                               |                                                                                                                                                                                                                |                                              |
| Dibenzo[a,h]anthracene (D[a,h]a)    | $PNEC_{\text{water}}= 0.024 \mu\text{g/l}$ , and $PNEC_{\text{soil}}= 77.5 \text{ mg/kg}$ * <sup>52</sup> .                                                               |                                                                                                                                                                                                                |                                              |

| Chemical                                                   | Ecological hazard                                                                                                                                 | Health hazard                                                                                                                                                              |
|------------------------------------------------------------|---------------------------------------------------------------------------------------------------------------------------------------------------|----------------------------------------------------------------------------------------------------------------------------------------------------------------------------|
| Indeno[1,2,3-cd]pyrene (I[1,2,3-cd]p)                      | PNEC <sub>soil</sub> = 91.3 mg/kg *                                                                                                               |                                                                                                                                                                            |
| Naphtalene                                                 | PNEC <sub>water</sub> = 2.24 µg/l, PNEC <sub>sediment</sub> = 67.2 µg /kg and PNEC <sub>soil</sub> = 53.3 µg /kg <sup>45</sup> .                  | Mild toxicity; carcinogenic effects not probable <sup>44, 45</sup> . Subchronic NOAEL of 7.1 mg/kg bw/d <sup>44</sup> .                                                    |
| CCl <sub>4</sub>                                           | PNEC <sub>sediment</sub> = 5.8 µg/kg <sup>51</sup> .                                                                                              | Probable human carcinogen <sup>43, 44</sup> .                                                                                                                              |
| ADAF ((Benzo)triazoles)                                    | Toxic to some species; PNEC not available for compartments.                                                                                       | Mild toxicity <sup>57, 58</sup> . No NOAEL available.                                                                                                                      |
| ADAF (nonylphenol ethoxylates, alkylphenol polyethoxylate) | Endocrine disruptors <sup>45, 59-63</sup> . Nonylphenol: PNEC <sub>sediment</sub> = 39 µg/kg <sup>51</sup> .                                      | Have been shown to degrade to produce byproducts, namely nonylphenol and octylphenol, known endocrine disruptors on animals and possibly also on humans <sup>59-62</sup> . |
| Perfluorchemicals                                          | PFOS: PNEC <sub>water</sub> = 19.0 µg/l <sup>64</sup> , and PNEC <sub>sediment</sub> = 67.0 µg/kg <sup>51</sup> .                                 | Endocrine disruptors <sup>65-69</sup> . Limited data.                                                                                                                      |
| Cd                                                         | PNEC <sub>water</sub> = 0.19 µg/l, PNEC <sub>sediment</sub> = 2.3 mg/kg, and PNEC <sub>soil</sub> = 0.9 mg/kg, <sup>43</sup> .                    | Probable human carcinogen <sup>44, 55</sup> .                                                                                                                              |
| Cr                                                         | PNEC <sub>sediment</sub> = 31.0 mg/kg (Cr(III)) <sup>51</sup> .                                                                                   | Cr(VI): Human carcinogen, group 1 <sup>70</sup> .                                                                                                                          |
| Cu                                                         | PNEC <sub>water</sub> = 1.6 µg/l <sup>52</sup> , and PNEC <sub>soil</sub> = 2700 µg/kg <sup>53</sup>                                              | Long-term studies yet unavailable <sup>43, 44</sup> .                                                                                                                      |
| Ni                                                         | PNEC <sub>water</sub> = 2.74 µg/l, and PNEC <sub>soil</sub> = 29.9 mg/kg <sup>45</sup> .                                                          | Mild toxicity <sup>43, 44</sup> . Subchronic NOAEL of 5.0 mg/kg bw/d <sup>44</sup> .                                                                                       |
| As                                                         | PNEC <sub>water</sub> = 0.5 µg/l (total dissolved) <sup>71</sup> , and PNEC <sub>soil</sub> = 1.8 mg/kg (both trioxide and total) <sup>53</sup> . | Human carcinogen <sup>43, 44</sup> .                                                                                                                                       |
| Pb                                                         | PNEC <sub>soil</sub> = 53.4 mg/kg (lead and compounds) <sup>53</sup> .                                                                            | Probable human carcinogen <sup>43, 44</sup> .                                                                                                                              |
| Zn                                                         | PNEC <sub>water</sub> = 7.8 µg/l, PNEC <sub>sediment</sub> = 49 mg/kg, and PNEC <sub>soil</sub> = 26 mg/kg <sup>45</sup> .                        | Mild toxicity <sup>43-45</sup> . Subchronic NOAEL of 0.83 mg/kg bw/d <sup>45</sup> .                                                                                       |
| Pesticides                                                 | Variable according to active principle <sup>43, 44</sup> .                                                                                        | Variable according to active principle <sup>43, 44</sup> .                                                                                                                 |

23  
24  
25

PNEC = predicted no-effect concentrations; NOAEL = no observed adverse effect level

\*Based on EC<sub>10</sub> data for springtail *Folsomia fimetaria* included in Jensen and Sverdrup <sup>54</sup> and considering an assessment factor (AF) of 10 (see Falk-Filipsson et al. <sup>72</sup> for a discussion on AF) and PNEC=EC<sub>10</sub>/10.

26  
27  
28  
29

## REFERENCES

- 30 1. USEPA, *EPA superfund record of decision: Castle Air Force Base (6 Areas)*,  
31 CA3570024551, United States Environmental Protection Agency, 2006.
- 32 2. USEPA, *Third five-year review report for the Crystal City Airport site,*  
33 *Crystal City, Zavala County, Texas, TXD980864763*, United States  
34 Environmental Protection Agency, 2006.
- 35 3. USEPA, *Third five-year review report for Middletown airfield, Middletown,*  
36 *Dauphyn County, PA*, United States Environmental Protection Agency, 2001.
- 37 4. L. Paterson, T. S. Kennedy and D. Sweeney, in *Remediation Technologies*  
38 *Symposium, October 15-17, 2008*, Environmental Services Association of  
39 Alberta, Banff, Alberta, USA, Editon edn., 2008, pp. 91-92.
- 40 5. C. A. Moody and J. A. Field, *Environmental Science & Technology*, 2000, **34**,  
41 3864-3870.
- 42 6. C. A. Moody, G. N. Hebert, S. H. Strauss and J. A. Field, *Journal of*  
43 *Environmental Monitoring*, 2003, **5**, 341-345.
- 44 7. USEPA, *NPL site narrative for Tri-County Public Airport, Tri-County airport,*  
45 *Kansas, KS0001402320*, United States Environment Protection Agency,  
46 2007.
- 47 8. AC, *Seattle-Tacoma International airport, Phase 1 Groundwater study report*,  
48 Aspect Consulting, LLC. Aspect Consulting, LLC. Prepared for Port of  
49 Seattle, 2005.
- 50 9. SWDE, *Yakima City Airport - Agreed Order No.DE-6522*, State of  
51 Washington Department of Ecology, USA, 2009.
- 52 10. USEPA, *Five-Year review report first five-year review report for New*  
53 *Hanover County Airport burn pit*, United States Environmental Protection  
54 Agency, 2008.
- 55 11. ATSDR, *Public health assessment - U.S. Air force Twin Cities Reserve*  
56 *Smallarms Range (Minneapolis St. Paul International Airport Air*  
57 *Reservestation), Minneapolis, Hennepin County, Minnesota - Public Health*  
58 *Assessments & Health Consultations*, 2010.
- 59 12. ATSDR, *Public health assessment - George Air Force Base, Victorville,*  
60 *California - Public Health Assessments & Health Consultations*, 2010.
- 61 13. ATSDR, *Public health assessment - Marine Corps Air Station Yuma, Yuma,*  
62 *Arizona - Public Health Assessments & Health Consultations*, 2010.
- 63 14. ATSDR, *Public health assessment - El Toro Marine Corps Air Station, Santa*  
64 *Ana, Orange County, California - Public Health Assessments & Health*  
65 *Consultations*, 2010.
- 66 15. EF, *Second five-year review report for Hanscom Field/Hanscom Air Force*  
67 *Base Superfund Site*, United States Environmental Protection Agency, 2002.
- 68 16. D. W. Rice, W. W. McNab, P. C. Johnson, L. G. Everett, W. E. Kastenberg,  
69 M. C. Kavanaugh, S. Pelmulder, M. C. Small and R. C. Ragaini, *Department*  
70 *of Defense petroleum hydrocarbon cleanup demonstration program - Final*  
71 *Report. Risk-informed decision making at petroleum contaminated sites,*  
72 *UCRL-AR-131771*, Lawrence Livermore National laboratory, University of  
73 California, Livermore, California, 1998.

- 74 17. MACV, *Supplemental environmental evaluation 2009. Runway 12L/30R*  
75 *segment 2 reconstruction*, Metropolitan Airports Commission Aviation. Noise  
76 and Satellite Programs Office, 2009.
- 77 18. TSBC, *Jet fuel leak, Terminal 2, Pearson International Fuel Facilities*  
78 *Corporation, operated by Consolidated Aviation Services Gates 78 and 80,*  
79 *Toronto/Lester B. Pearson International Airport, Mississauga, Ontario,*  
80 *P94H0004*, 2010.
- 81 19. MCA, *Kai Tak Airport north apron decommissioning. Environmental impact*  
82 *assessment executive summary*, Maunsell Consultants Asia, Ltd. & CES  
83 (Asia), Ltd. - submitted to Territory Development Department, Hong Kong,  
84 1998.
- 85 20. J. Masak, J. Machackova, M. Siglova, A. Cejkova and V. Jirku, 5th  
86 International Conference on Small Water and Wastewater Treatment Systems,  
87 Istanbul, Turkey, 2002.
- 88 21. ODEQ, *Environmental cleanup site information (ECSI) database site*  
89 *summary Full Report - Details for Site ID 92, AAR Western Skyways*, 2010.
- 90 22. IFC-WBG, *Sangster International Airport Montego Bay, Jamaica -*  
91 *Environmental review summary*, 2010.
- 92 23. S. Baran, J. E. Bielinska and P. Oleszczuk, *Geoderma*, 2004, **18**, 221-232.
- 93 24. S. Ray, P. S. Khillare, T. Agarwal and V. Shridhar, *J. Hazard. Mater.*, 2008,  
94 **156**, 9-16.
- 95 25. V. Barcan, E. Kovnatsky and A. Shylina, *Atmospheric Environment*, 2000, **34**,  
96 1225-1231.
- 97 26. C. Crepineau-Ducoulombier and G. Rychen, *Agronomie*, 2003, **23**, 345-348.
- 98 27. S. Hu, S. Fruin, K. Kozawa, S. Mara, A. M. Winer and S. E. Paulson,  
99 *Environmental Science & Technology*, 2009, **43**, 8039-8045.
- 100 28. M. R. Konowski, G. D. Breedveld and P. Aagaard, *Environmental Geology*,  
101 2005, **48**, 1040-1057.
- 102 29. S. Vasarevicius, K. Gričiūtė and E. Siaulytė, *Journal of Environmental*  
103 *Engineering and Landscape Management*, 2005, **XIII**, 160-166.
- 104 30. V. Ellefsen, T. Westby, R. A. Systad and Millpress, 16th International  
105 Conference on Soil Mechanics and Geotechnical Engineering, Osaka, JAPAN,  
106 2005.
- 107 31. Z. E. Vasilic, N. Peris, M. Wilken and V. Drevenkar, *Int J Environ Anal*  
108 *Chem*, 2004, **84**, 1093-1103.
- 109 32. I. Wagner-Döbler, A. Bennasar, L. M. Vancanneyt, A. Strömpl, I. Brümmer,  
110 C. Eichner, I. Grammel and R. B. Moore, *Appl Environ Microbiol*, 1998, **64**,  
111 3014-3022.
- 112 33. D. A. Cancilla, J. C. Baird and R. Rosa, *Bulletin of Environmental*  
113 *Contamination and Toxicology*, 2003, **70**, 868-875.
- 114 34. D. A. Cancilla, J. Martinez and G. C. Van Aggelen, *Environmental Science &*  
115 *Technology*, 1998, **32**, 3834-3835.
- 116 35. K. S. McNeill and D. A. Cancilla, *Bulletin of Environmental Contamination*  
117 *and Toxicology*, 2009, **82**, 265-269.
- 118 36. G. D. Breedveld, R. Roseth, M. Sparrevik, T. Hartnik and L. J. Hem, *Water,*  
119 *Air, & Soil Pollution: Focus*, 2003, **3**, 91-101.
- 120 37. PA, *Perth airport annual environment report 07-08*, Perth Airport, 2008.
- 121 38. D. H. Kampbell, C. B. Snyder, D. C. Downey and J. E. Hansen, *Journal of*  
122 *Hazardous Substance Research*, 2001, **3**, 1-7.



- 123 39. D. N. Tzovolou, Y. Benoit, F. Haeseler, K. E. Klint and C. D. Tsakiroglou,  
124 *Science of the Total Environment*, 2009, **407**, 3044-3054.
- 125 40. AIG, *Rapport environnemental, période 2002-2004*, Aéroport International de  
126 Genève, Suisse, 2005.
- 127 41. A. Peter, B. Miles and G. Teutsch, *Environmental Geology*, 2008, **55**, 321-  
128 337.
- 129 42. J. Machackova, Z. Wittlingerova, K. Vlk, J. Zima and A. Linka, *Water Air and  
130 Soil Pollution*, 2008, **187**, 181-194.
- 131 43. IPCS, *Chemical safety information from intergovernmental organizations*,  
132 <http://www.inchem.org/>, 2010.
- 133 44. USEPA, *Integrated Risk Information System (IRIS)*, <http://www.epa.gov/ncea/iris/>, 2010.
- 135 45. IHCP-EC, *Online European risk assessment tracking system*, <http://ecb.jrc.europa.eu/esis/index.php?PGM=ora>, 2010.
- 137 46. MEGJ, *Profiles of the initial environmental risk assessment of chemicals:  
138 Chemical substances control law reference no. 2-103 (as dichloroethylene)*,  
139 Ministry of the Environment, Government of Japan, nd.
- 140 47. ATSDR, *Interaction profile for: chloroform, 1,1-dichloroethylene,  
141 trichloroethylene, and vinyl chloride. Draft.*, Agency for Toxic Substances and  
142 Disease Registry, Public Health Service, U.S. Department of Health and  
143 Human Services, 2007.
- 144 48. OEHHA, *Public health goal for cis- and trans-1,2-dichloroethylene in  
145 drinking water*, Office of Environmental Health Hazard Assessment,  
146 California Environmental Protection Agency, Pesticide and Environmental  
147 Toxicology Section, 2004.
- 148 49. ECB, *European Union risk assessment report, tert-Butyl Methyl Ether, CAS  
149 No: 1634-04-4, EINECS No: 216-653-1, risk assessment*, European Chemical  
150 Bureau, Helsinki, Finland, 2002.
- 151 50. WHO, *Methyl tertiary-butyl ether (Environmental Health Criteria 206)*,  
152 World Health Organization, International Programme on Chemical Safety.  
153 Geneva, 1998.
- 154 51. INERIS, *Predicted no effect concentrations for the environment (PNECsed),  
155 sediments*, <http://www.ineris.fr>, 2010.
- 156 52. INERIS, *Predicted no effect concentrations for the environment (PNECaqua),  
157 freshwater*, <http://www.ineris.fr>, 2010.
- 158 53. INERIS, *Predicted no effect concentrations for the environment (PNECsoil),  
159 soils*, <http://www.ineris.fr>, 2010.
- 160 54. J. Jensen and L. Sverdrup, *Reviews of Environmental Contamination and  
161 Toxicology*, 2003, **179**, 73-97.
- 162 55. ATSDR, *Toxicological Profile Information Sheet*, <http://www.atsdr.cdc.gov/toxpro2.html#p>, 2010.
- 164 56. MEGJ, *Profiles of the initial environmental risk assessment of chemicals:  
165 Chemical substances control law reference Substance: Benzo[a]pyrene*,  
166 Ministry of the Environment, Government of Japan, nd.
- 167 57. G. Ducombs, J. M. Tamisier and L. Texier, *Contact Dermatitis*, 1980, **6**, 224-  
168 225.
- 169 58. P. Graff, E. Elmsjö, J. Björkander and U. Flodin, *Scand J Work Environ  
170 Health*, 2008, **34**, 403-404.
- 171 59. S. Jobling, D. Sheahan, J. A. Osborne, P. Matthiessen and J. P. Sumpter,  
172 *Environ. Toxicol. Chem.*, 1996, **15**, 194-202.

- 173 60. C. A. Staples, J. Weeks, J. F. Hall and C. G. Naylor, *Environ. Toxicol. Chem.*,  
174 1998, **17**, 2470-2480.
- 175 61. T. Zacharewski, *Environmental Science & Technology*, 1997, **31**, 613-623.
- 176 62. C. A. Harris, E. M. Santos, A. Janbakhsh, T. G. Pottinger, C. R. Tyler and J. P.  
177 Sumpter, *Environmental Science & Technology*, 2001, **35**, 2909-2916.
- 178 63. D. Voutsas, P. Hartmann, C. Schaffner and W. Giger, *Environmental Science  
179 and Pollution Research*, 2006, **13**, 333-341.
- 180 64. J. B. Stevens and A. Coryell, *Surface water quality criterion for  
181 perfluorooctane sulfonic acid*, STS Consultants, Ltd., prepared for Minnesota  
182 Pollution Control Agency, 2007.
- 183 65. MDH, *Perfluorooctane sulfonate (PFOS) - health risk limits for groundwater,  
184 2008, Rule Revision, 651-201-5797 TDD*, Health Risk Assessment Unit,  
185 Environmental Health Division, Minnesota Department of Health, USA, 2009.
- 186 66. MDH, *Perfluorobutane sulfonate (PFBS) - health risk limits for groundwater,  
187 2008, Rule Revision, 651-201-5797 TDD*, Health Risk Assessment Unit,  
188 Environmental Health Division, Minnesota Department of Health, USA, 2009.
- 189 67. MDH, *Perfluorobutyric acid (PFBA) - health risk limits for groundwater,  
190 Health Risk Assessment Unit, Environmental Health Division, Minnesota  
191 Department of Health, USA, 2009.*
- 192 68. MDH, *Perfluorohexane sulfonate (PFHxS) - health risk limits for  
193 groundwater, 2008, Rule Revision, 651-201-5797 TDD*, Health Risk  
194 Assessment Unit, Environmental Health Division, Minnesota Department of  
195 Health, USA, 2009.
- 196 69. MDH, *Perfluorooctanoic acid (PFOA) - health risk limits for groundwater,  
197 2008, Rule Revision, 651-201-5797 TDD*, Health Risk Assessment Unit,  
198 Environmental Health Division, Minnesota Department of Health, USA, 2009.
- 199 70. IARC, *IARC Monographs on the evaluation of carcinogenic risks to humans.  
200 Volume 49, chromium, nickel and welding*, International Agency for Research  
201 on Cancer, 1990.
- 202 71. UKEA, *Proposed EQS for Water Framework Directive Annex VIII  
203 substances: arsenic (total dissolved). Science Report: SC040038/SR3.  
204 SNIFFER Report: WFD52(iii)*, United Kingdom Technical Advisory Group on  
205 the Water Framework Directive, London., 2007.
- 206 72. A. Falk-Filipsson, A. Hanberg, K. Victorin, M. Warholm and M. Wallén,  
207 *Environmental Research*, 2007, **104**, 108-127.
- 208
- 209
